# Supplementary material for: Long-Term Oral Tamoxifen Administration Decreases Brain-Derived Neurotrophic Factor in the Hippocampus of Female Long-Evans Rats
Source: MDPI journal article supplement (doi:10.3390/cancers16071373), 2024-03-31
Supplement: s1 [file s1]

## Supplementary Figure S1: Body Condition Scoring

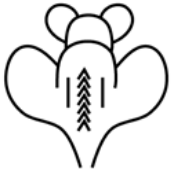

### BC 1

#### Rat is emaciated

- Segmentation of vertebral column prominent if not visible
- Little or no flesh cover over dorsal pelvis, pins prominent if not visible
- Segmentation of caudal vertebrae prominent

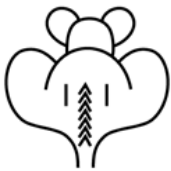

### BC 2

#### Rat is under-conditioned

- Segmentation of vertebral column prominent
- Thin flesh cover over dorsal pelvis, little subcutaneous fat, pins easily palpable
- Thin flesh cover over caudal vertebrae, segmentation palpable with slight pressure

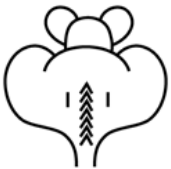

### BC 3

#### Rat is well-conditioned

- Segmentation of vertebral column easily palpable
- Moderate subcutaneous fat store over pelvis, pins easily palpable with slight pressure
- Moderate fat store around tail base, caudal vertebrae may be palpable but not segmented

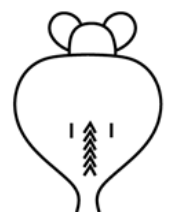

### BC 4

#### Rat is over-conditioned

- Segmentation of vertebral column palpable with slight pressure
- Thick subcutaneous fat store over dorsal pelvis, pins of pelvis palpable with firm pressure

## Supplementary Figure S1: Body Condition Scoring

- Thick fat store over tail base, caudal vertebrae not palpable

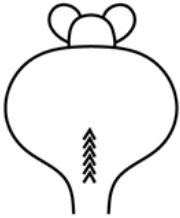

**BC 5**

**Rat is obese**

- Segmentation of vertebral column palpable with firm pressure, may be a continuous column
- Thick subcutaneous fat store over dorsal pelvis, pins of pelvis not palpable with firm pressure
- Thick fat store over tail base, caudal vertebrae not palpable

Adapted from: Hickman D, Swan M. 2010. Use of a Body Condition Score Technique to Assess Health Status in a Rat Model of Polycystic Kidney Disease, [JAALAS 49\(2\) 155-159](#)
